# Supplementary material for: Synergism of TNF-α and IFN-γ triggers inflammatory cell death, tissue damage, and mortality in SARS-CoV-2 infection and cytokine shock syndromes
Source: bioRxiv or medRxiv preprint supplement (doi:10.1101/2020.10.29.361048), 2020-11-13
Supplement: Supplementary file [file media-1.pdf]

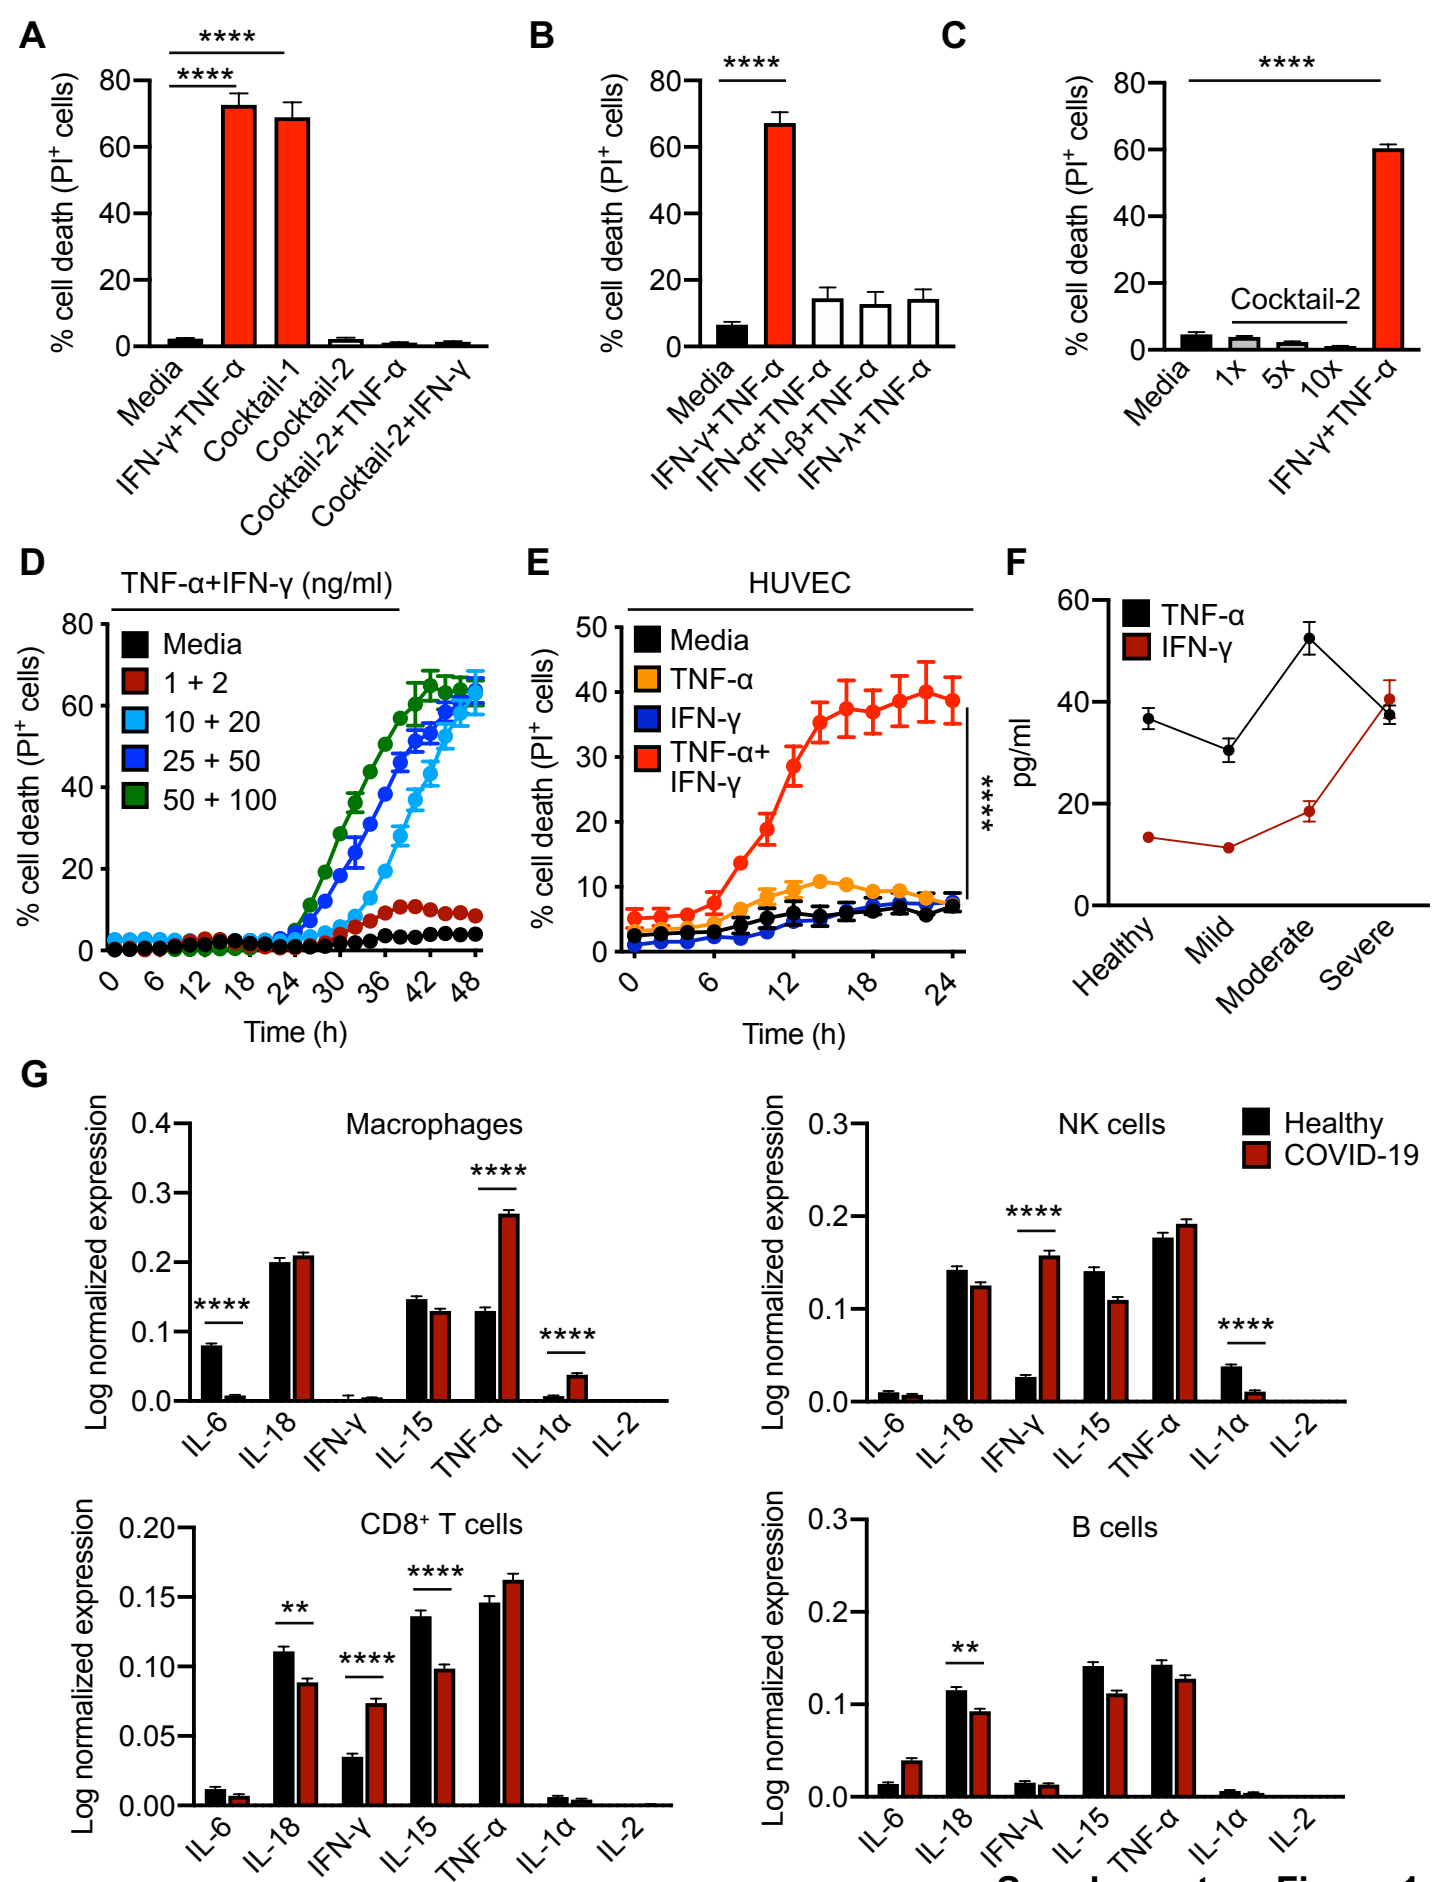

**Supplementary Figure 1**

**A**

Intestine (CD45 staining)

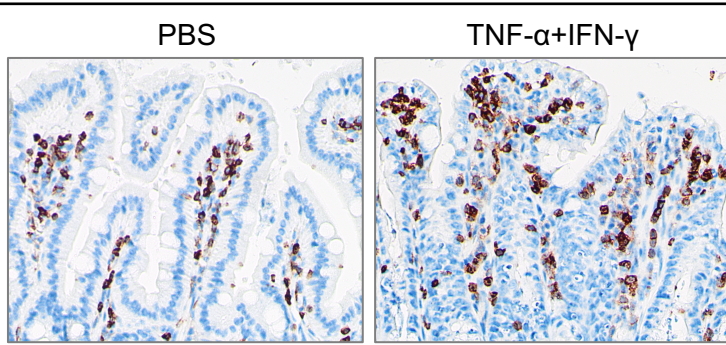**B**

Lungs

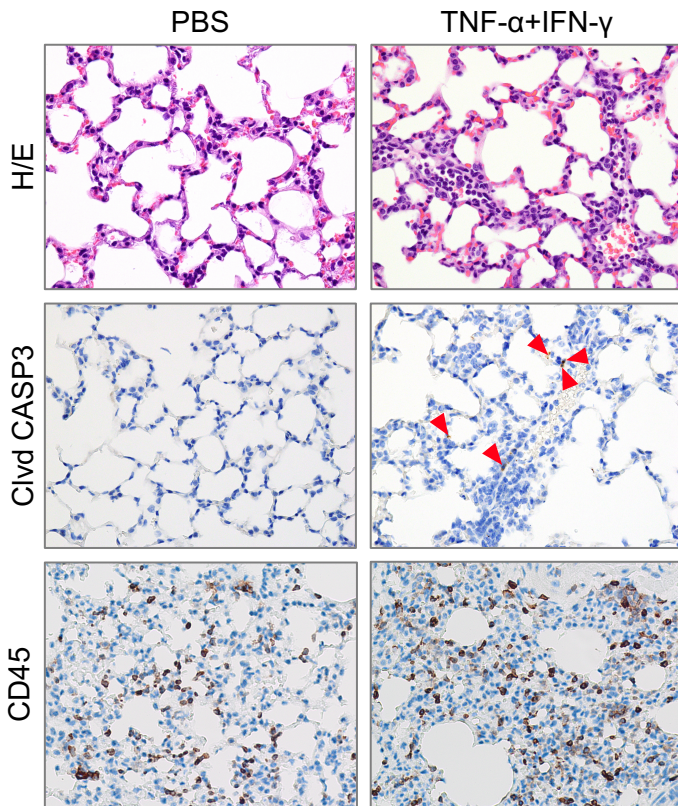**C**

Intestine

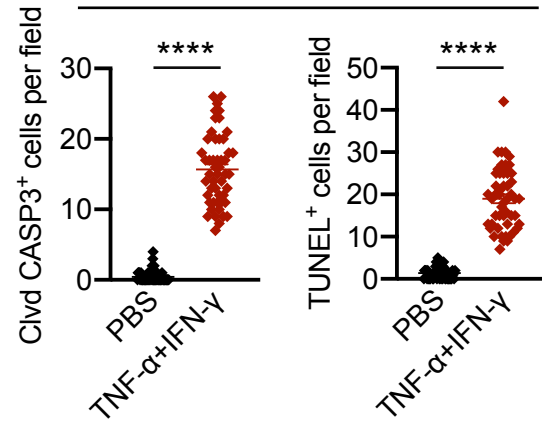**D**

Lungs

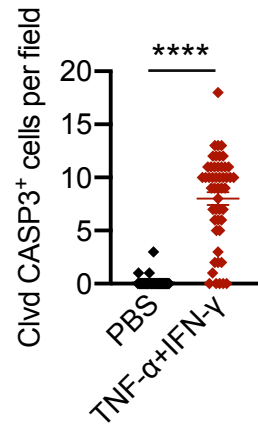

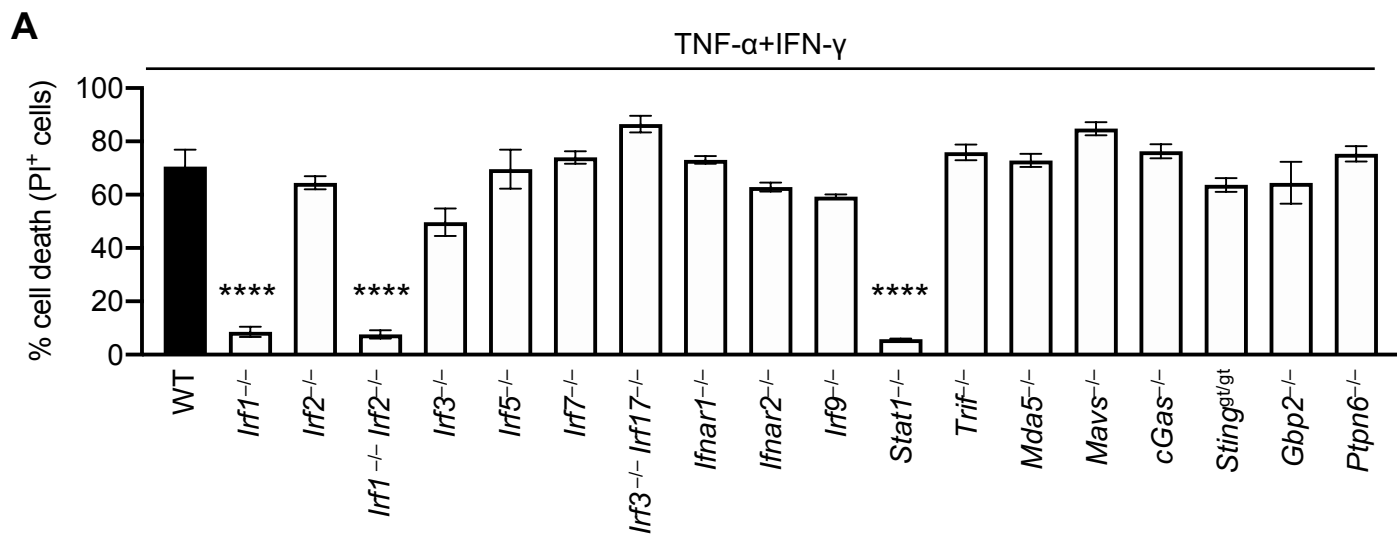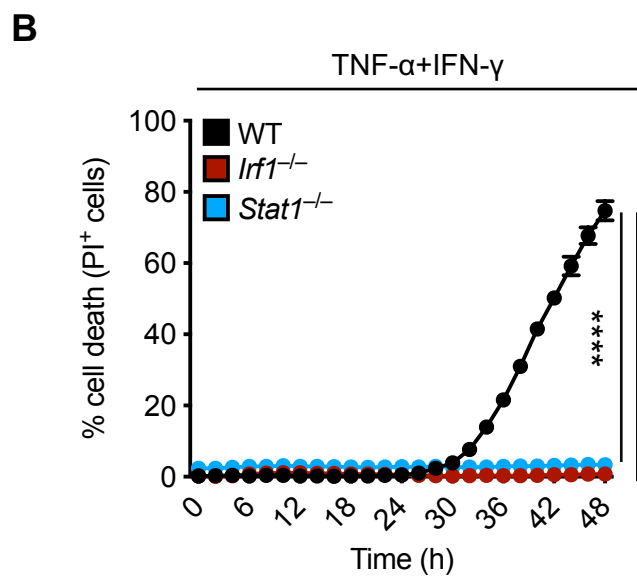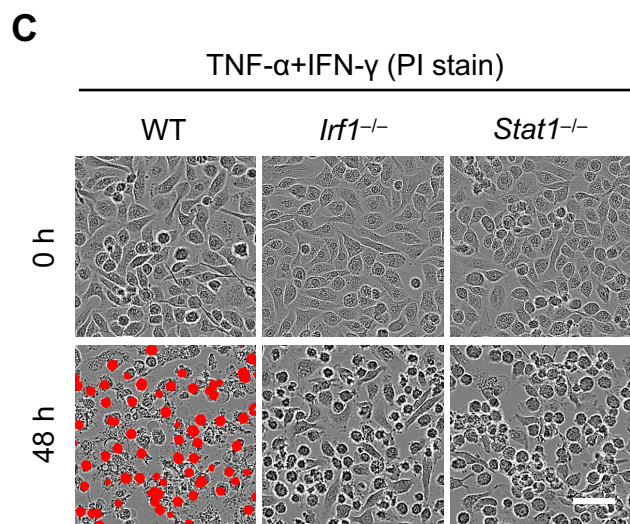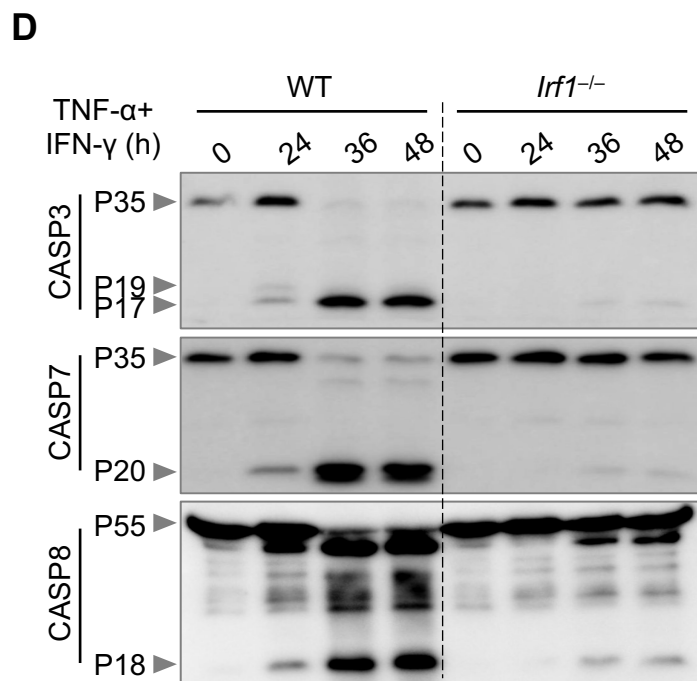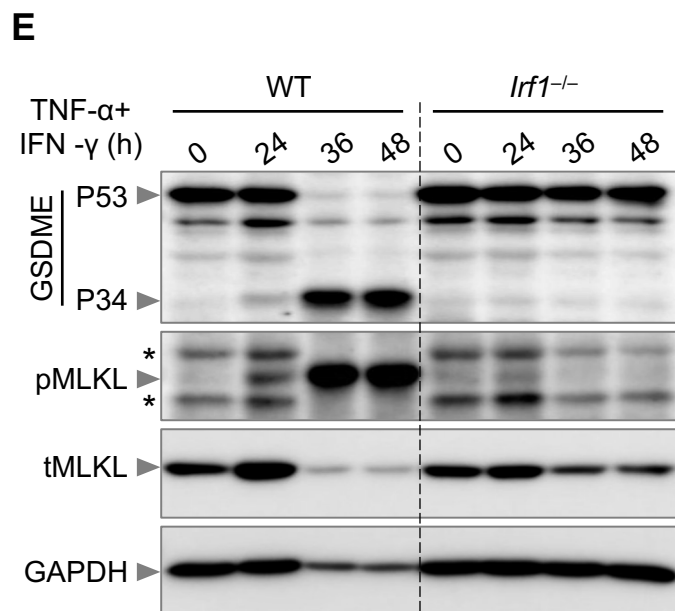

Supplementary Figure 3

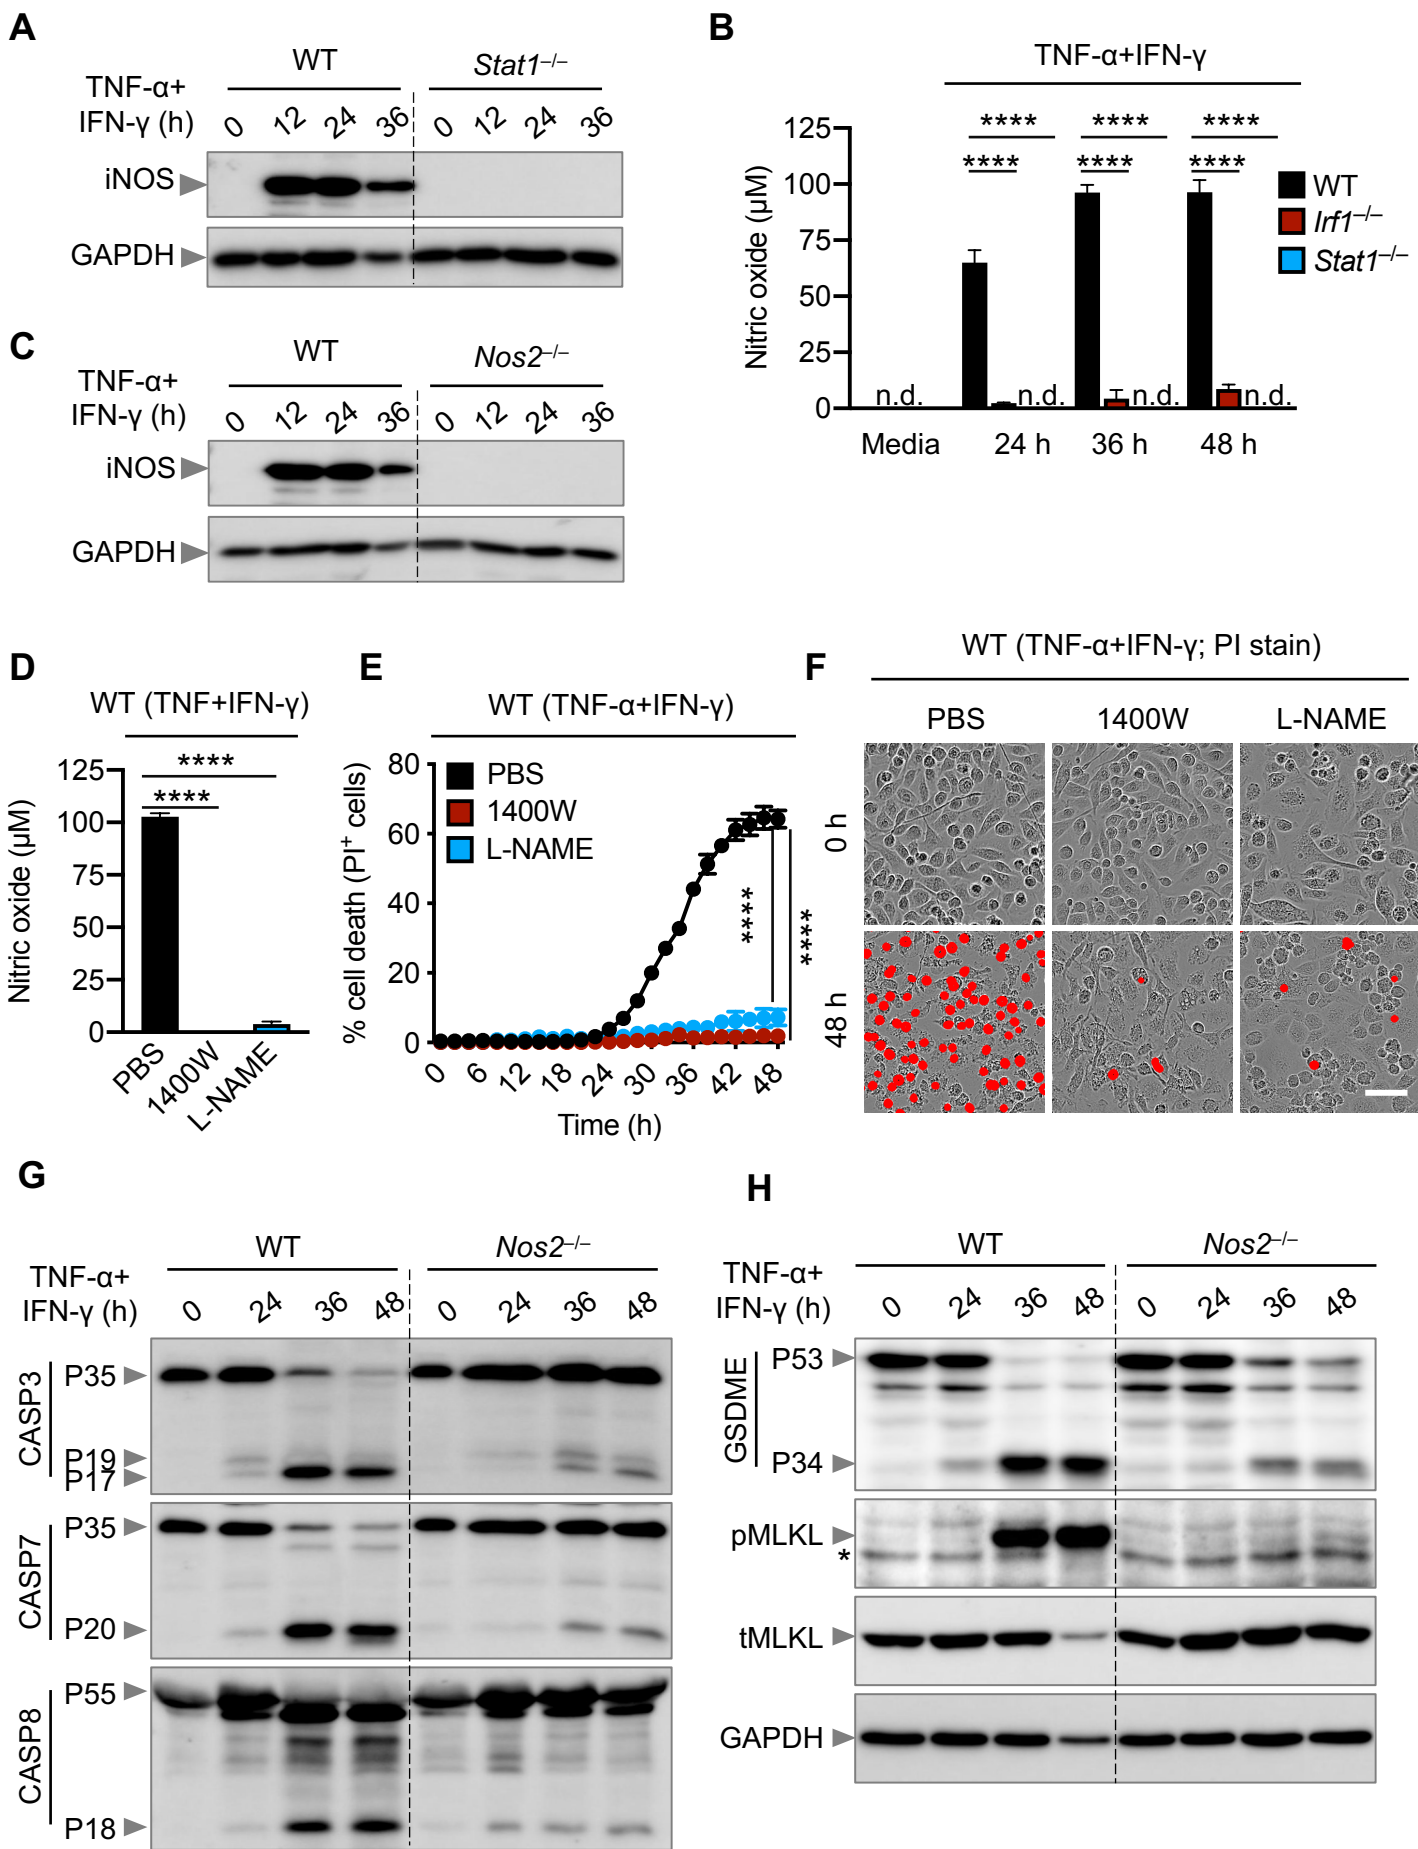

Supplementary Figure 4

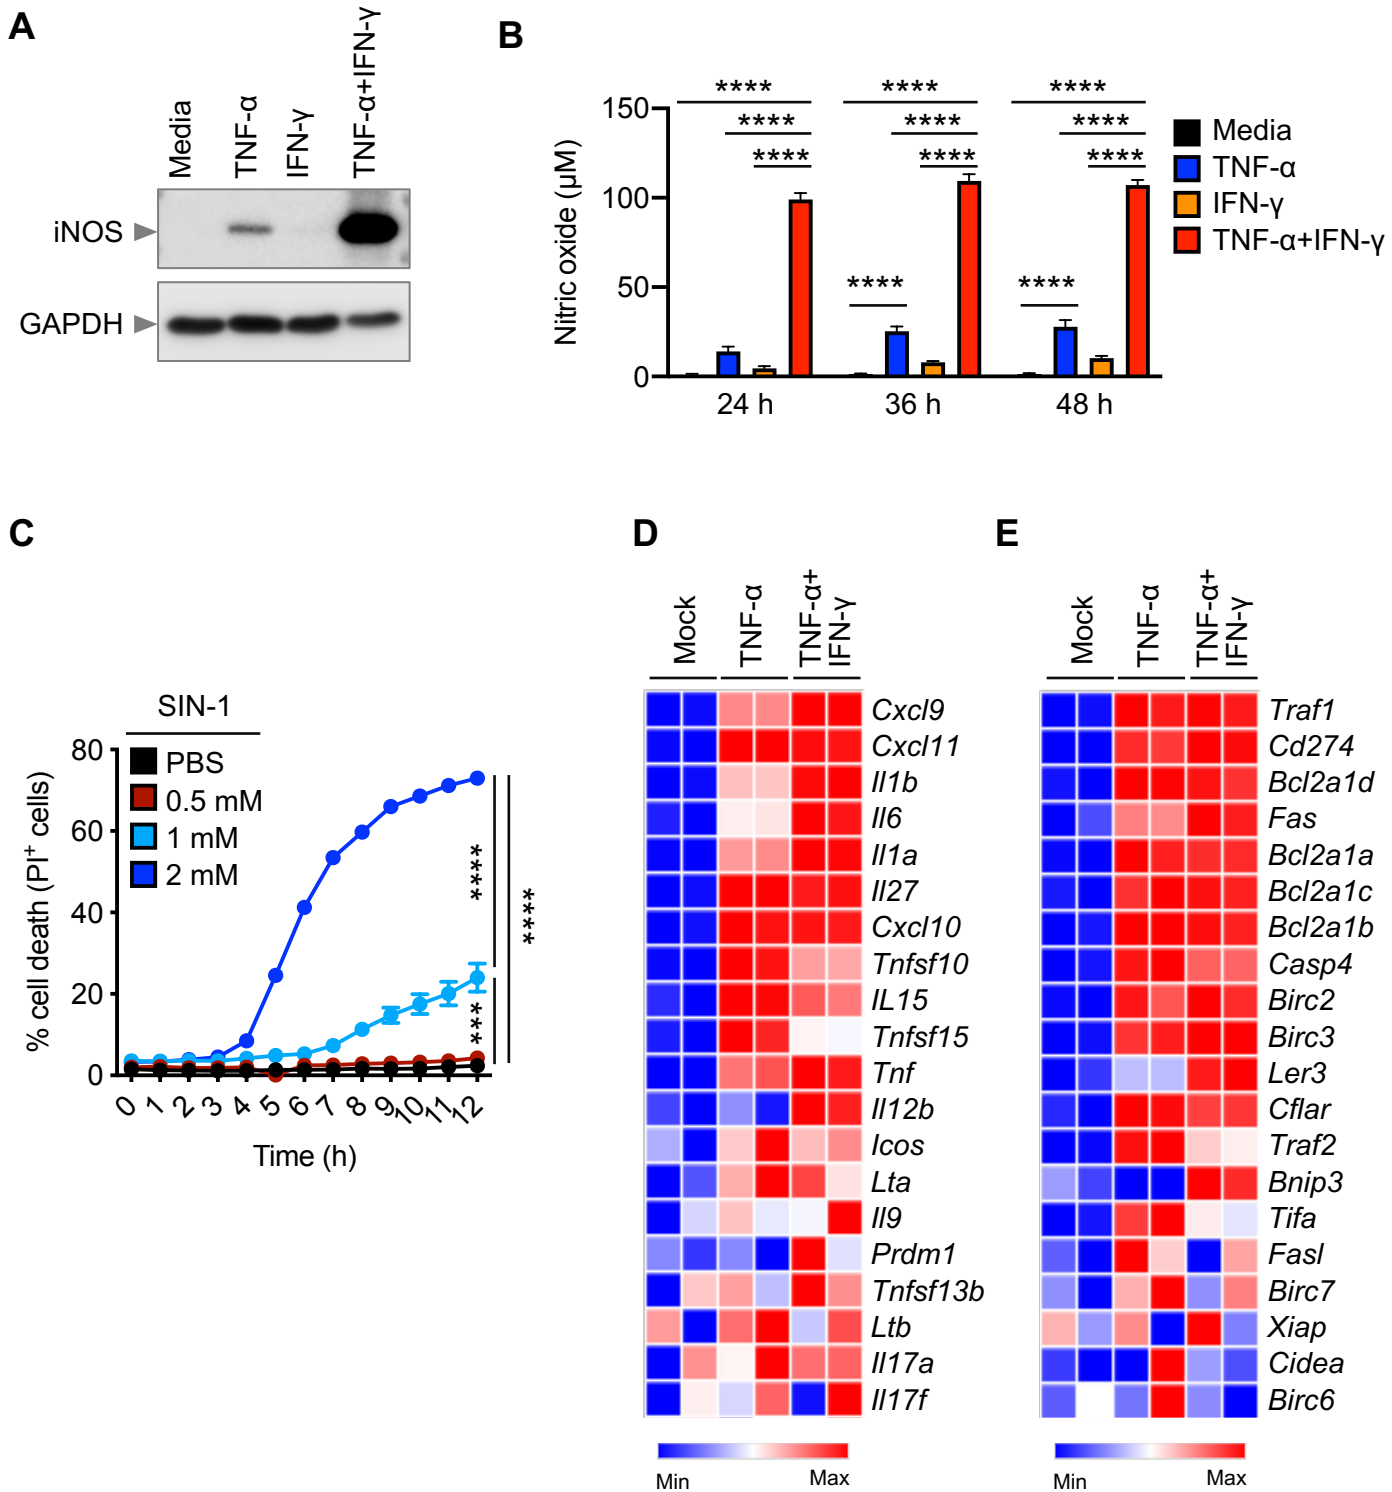

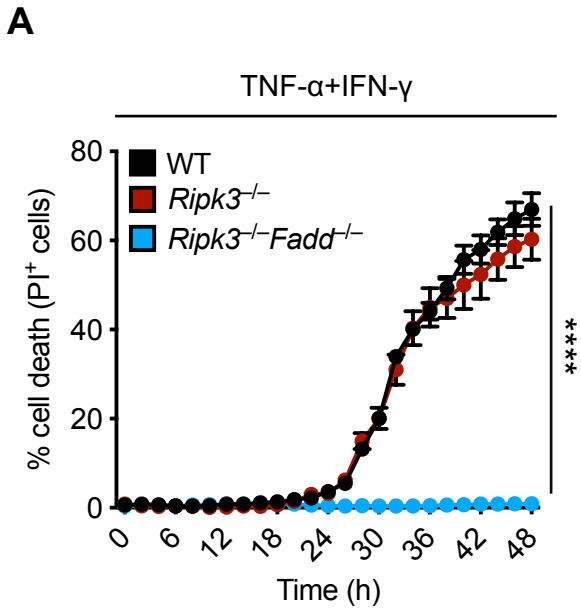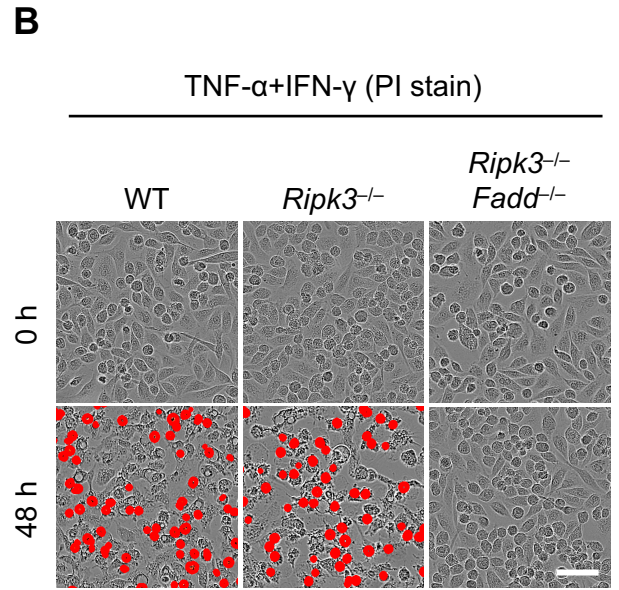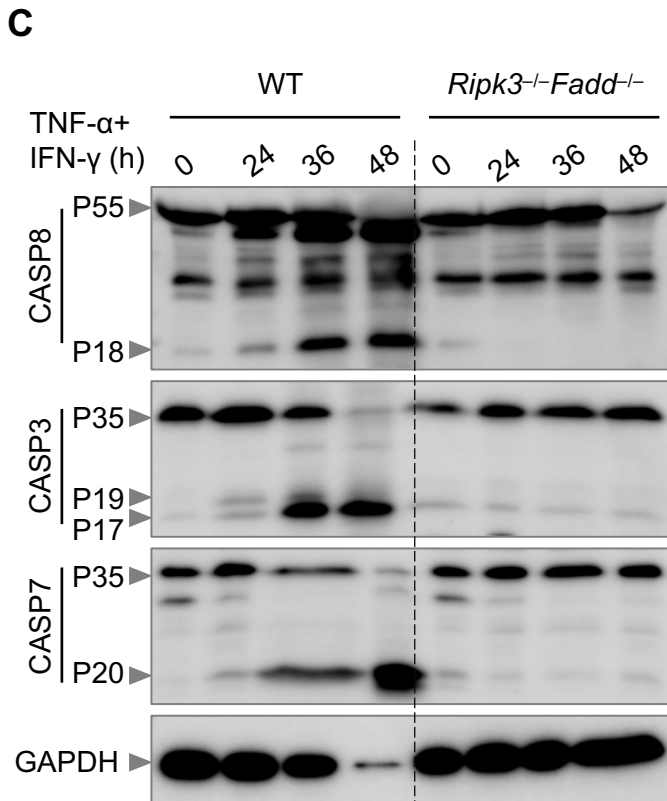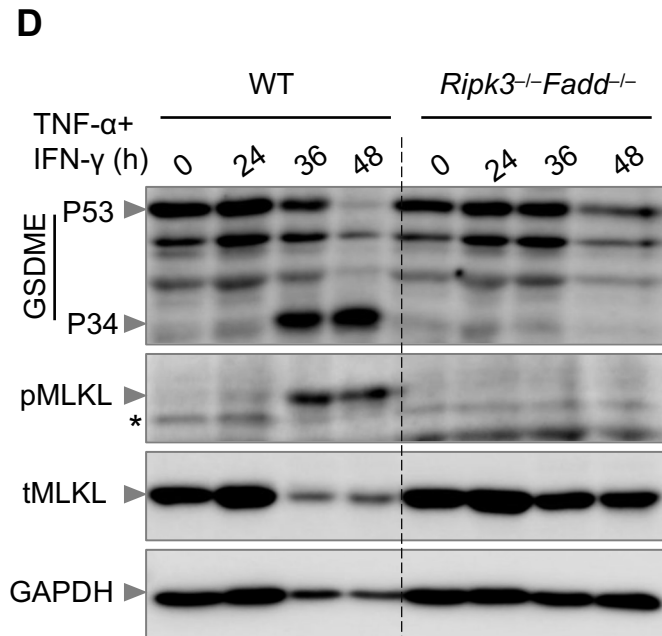

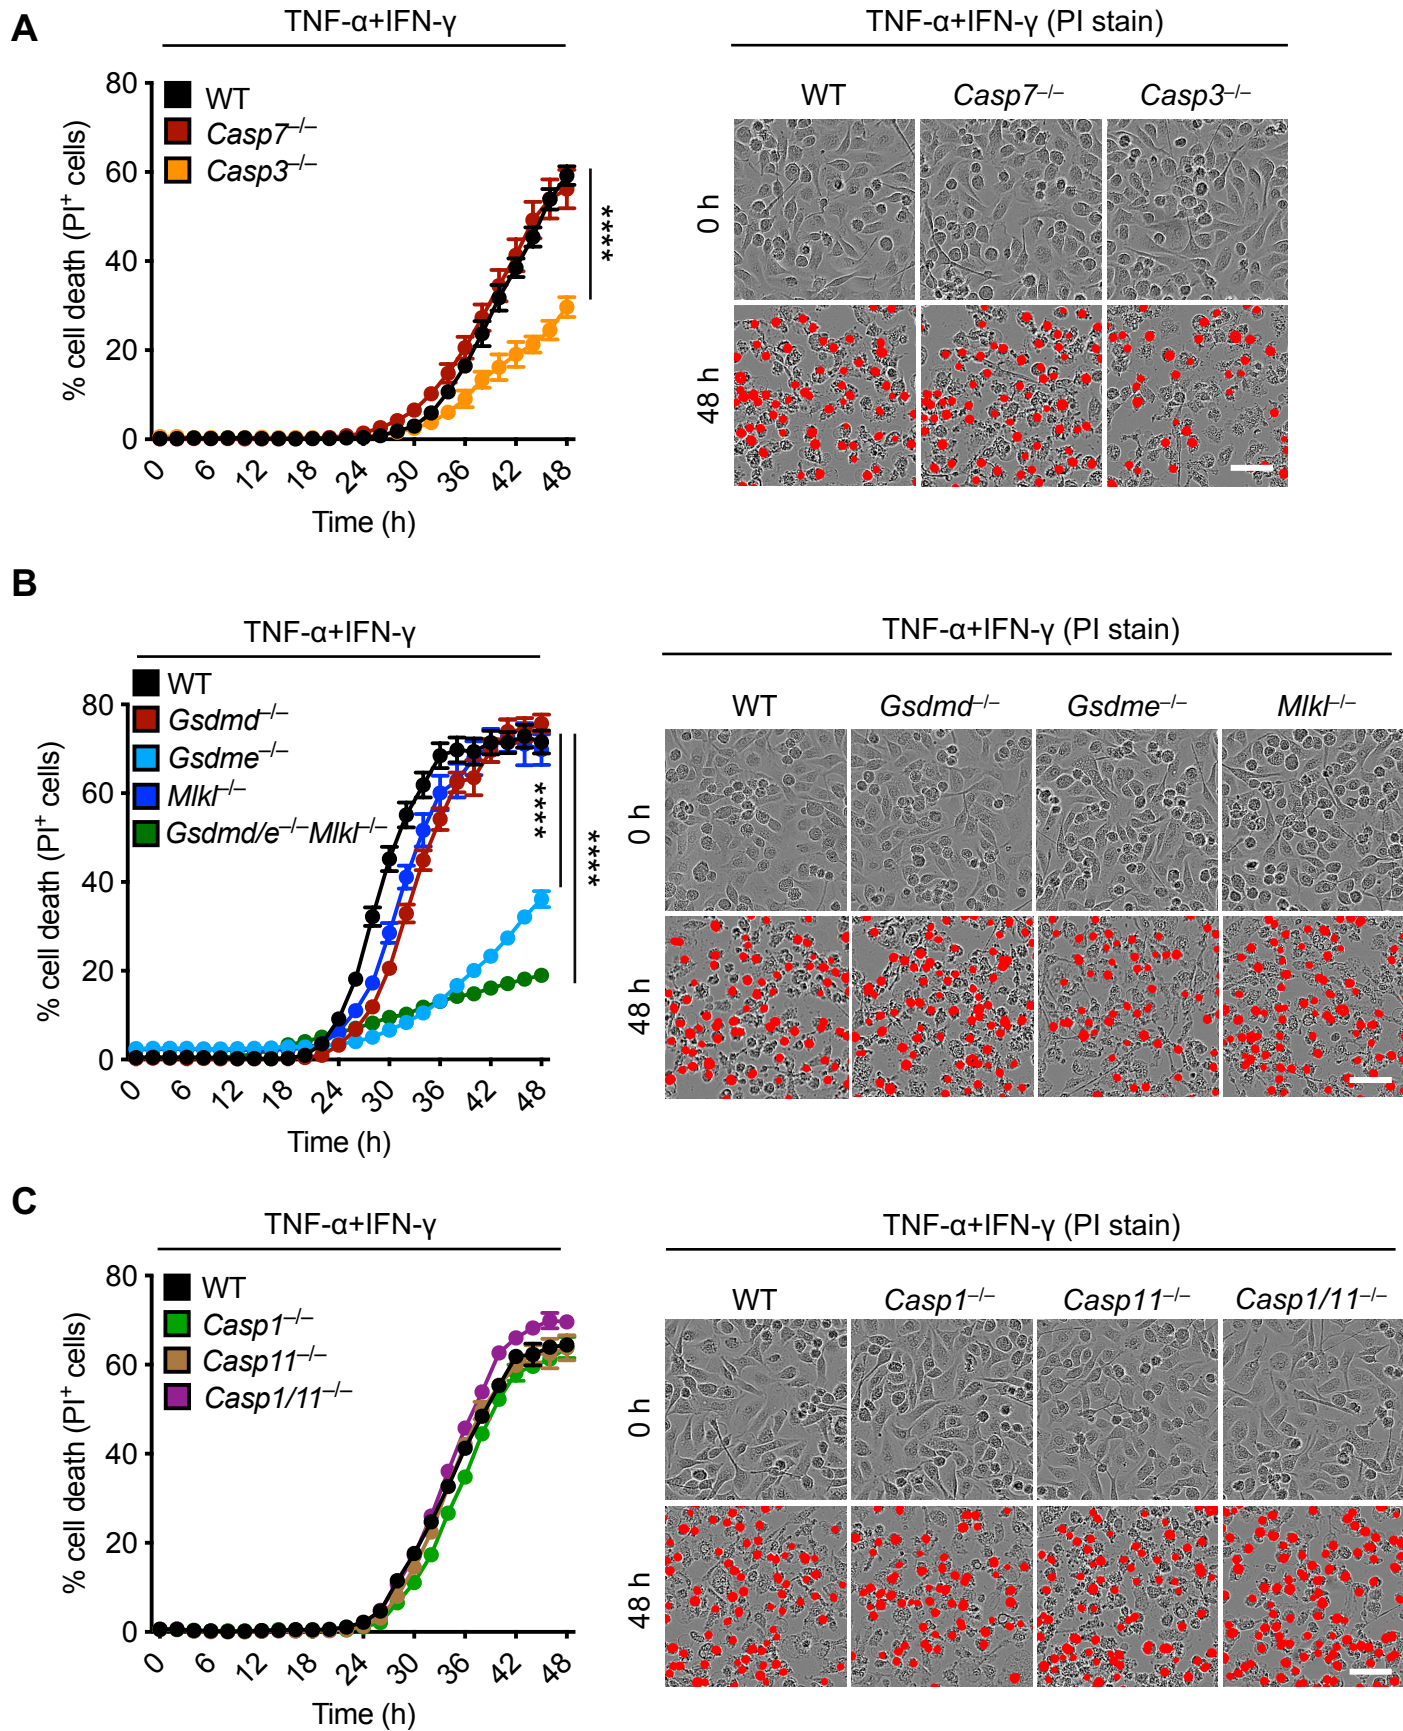

Supplementary Figure 7
